# Supplementary material
Source: PubMed Central journal article supplement (PMC5538567)

Supplementary Figure 1

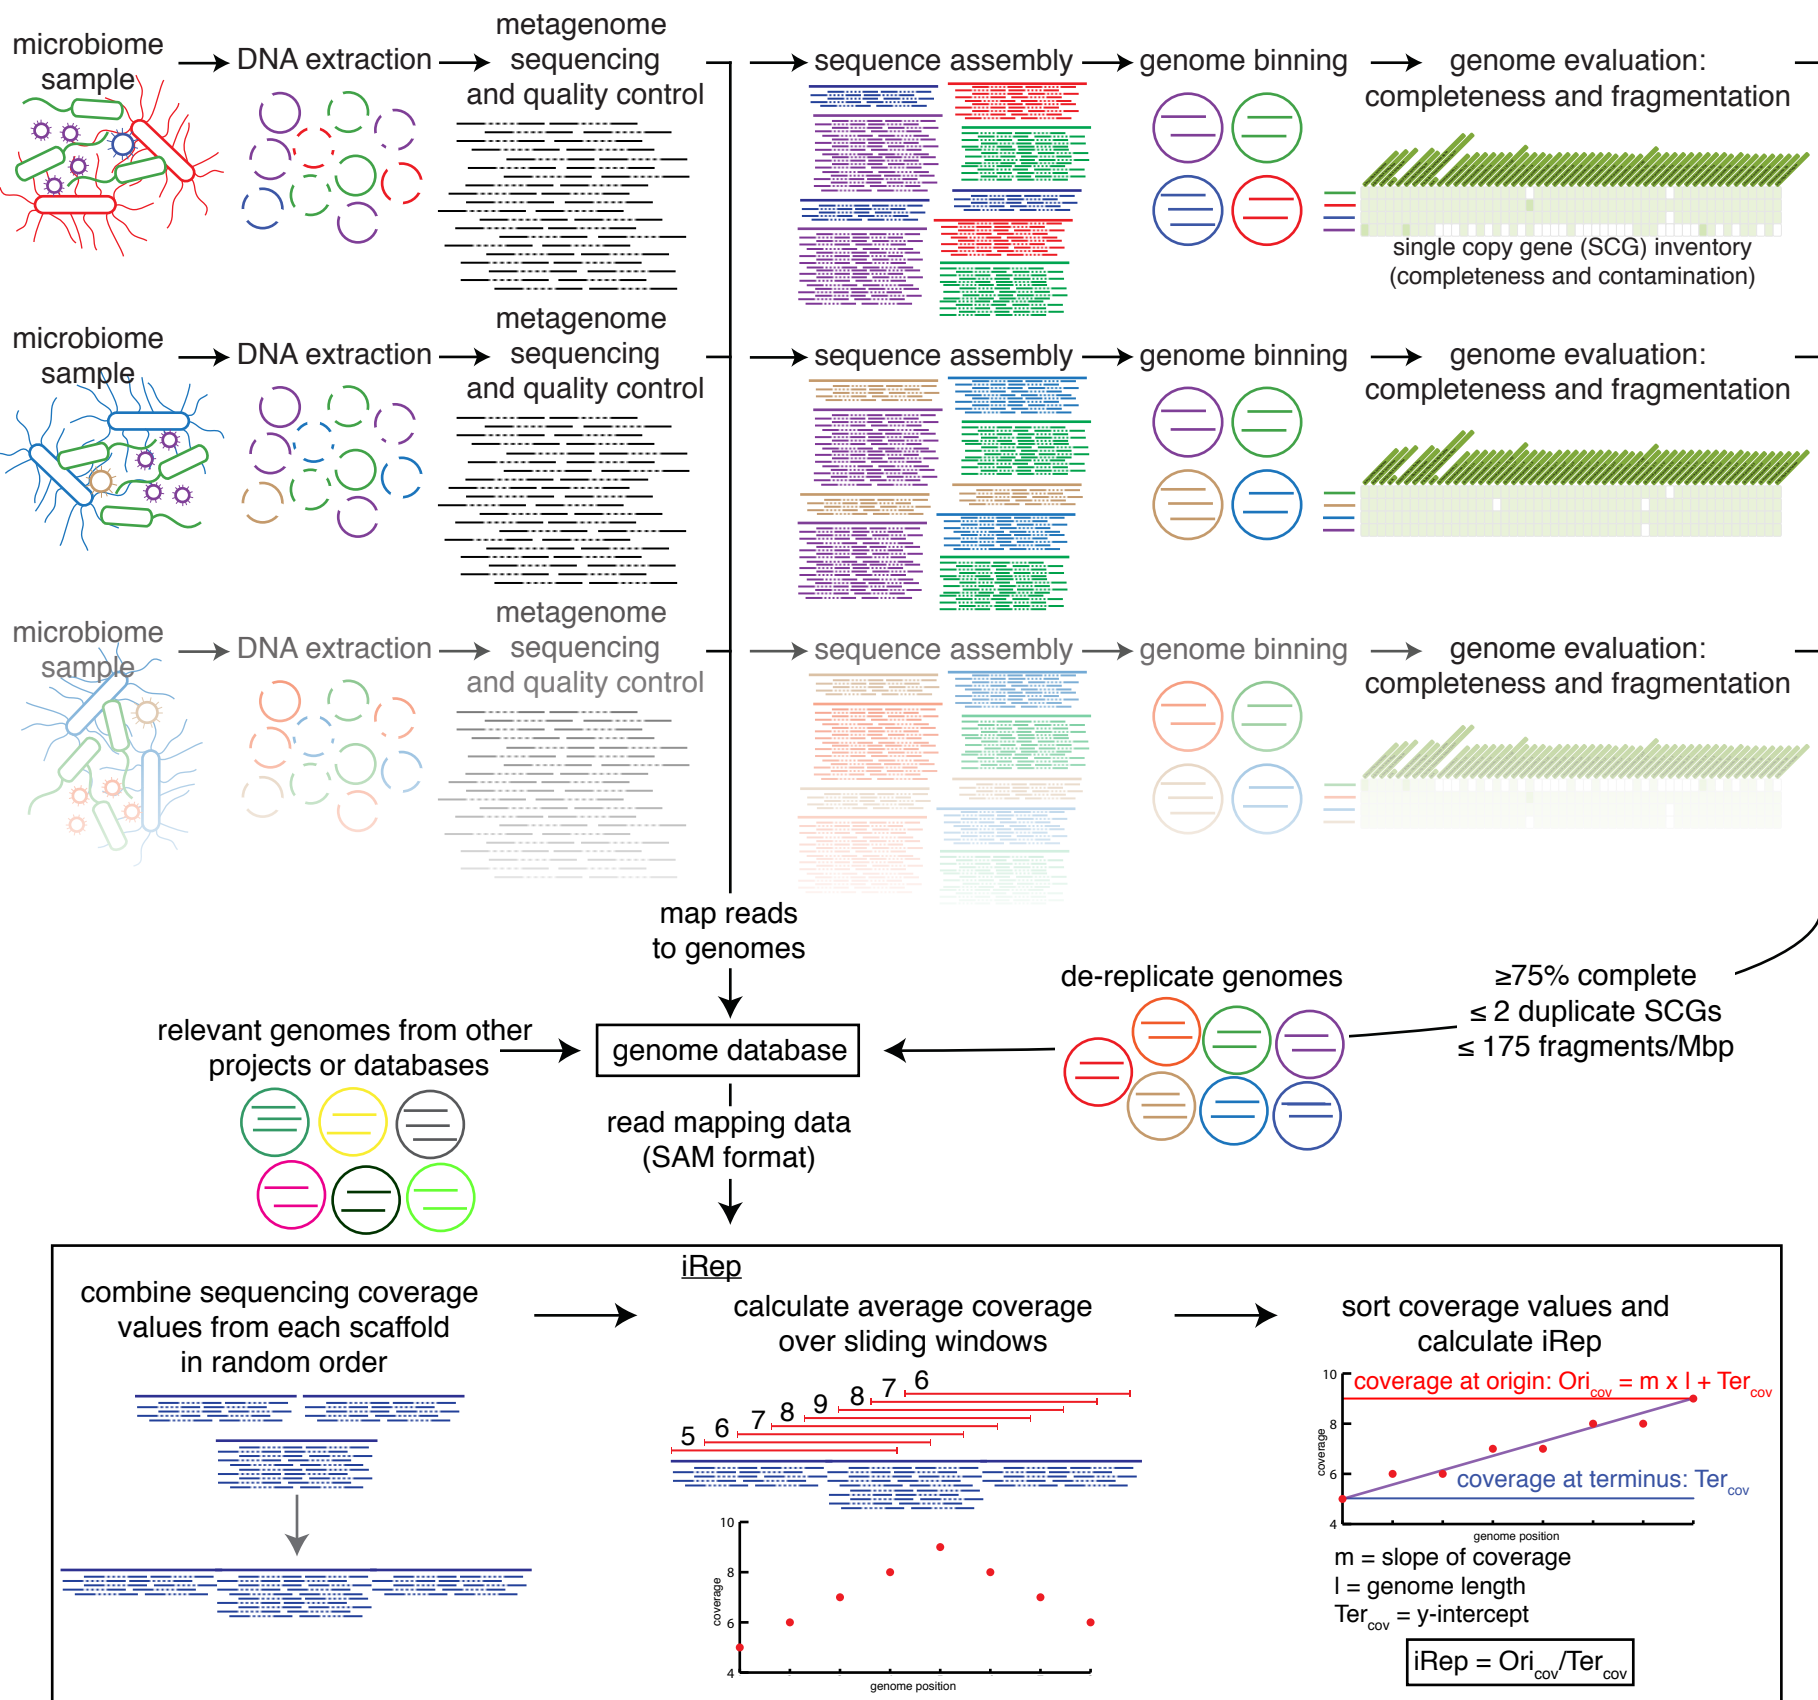

**a**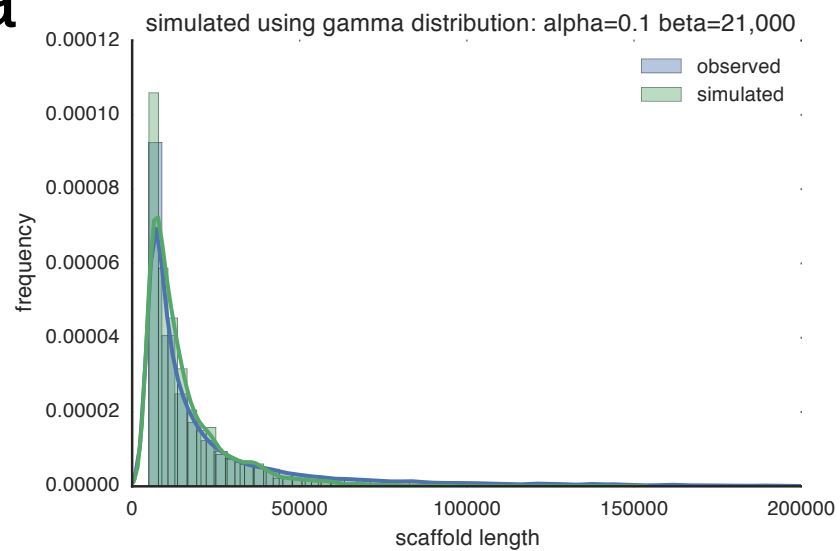**b**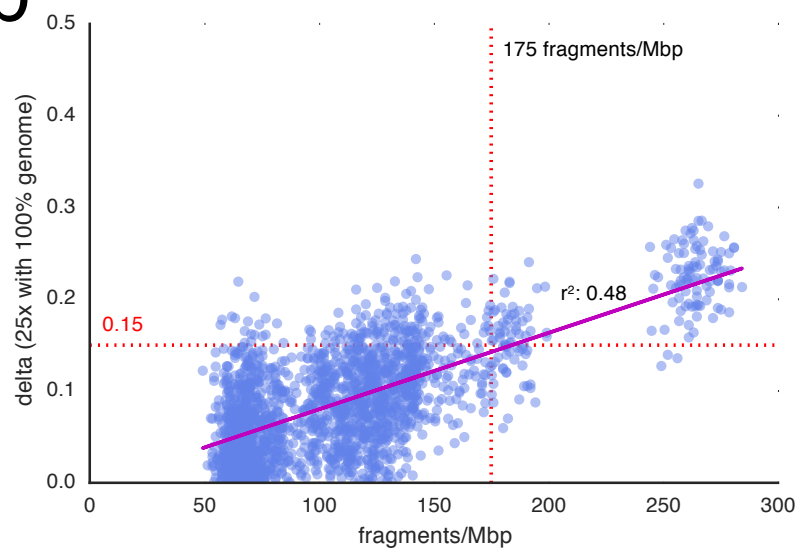**c**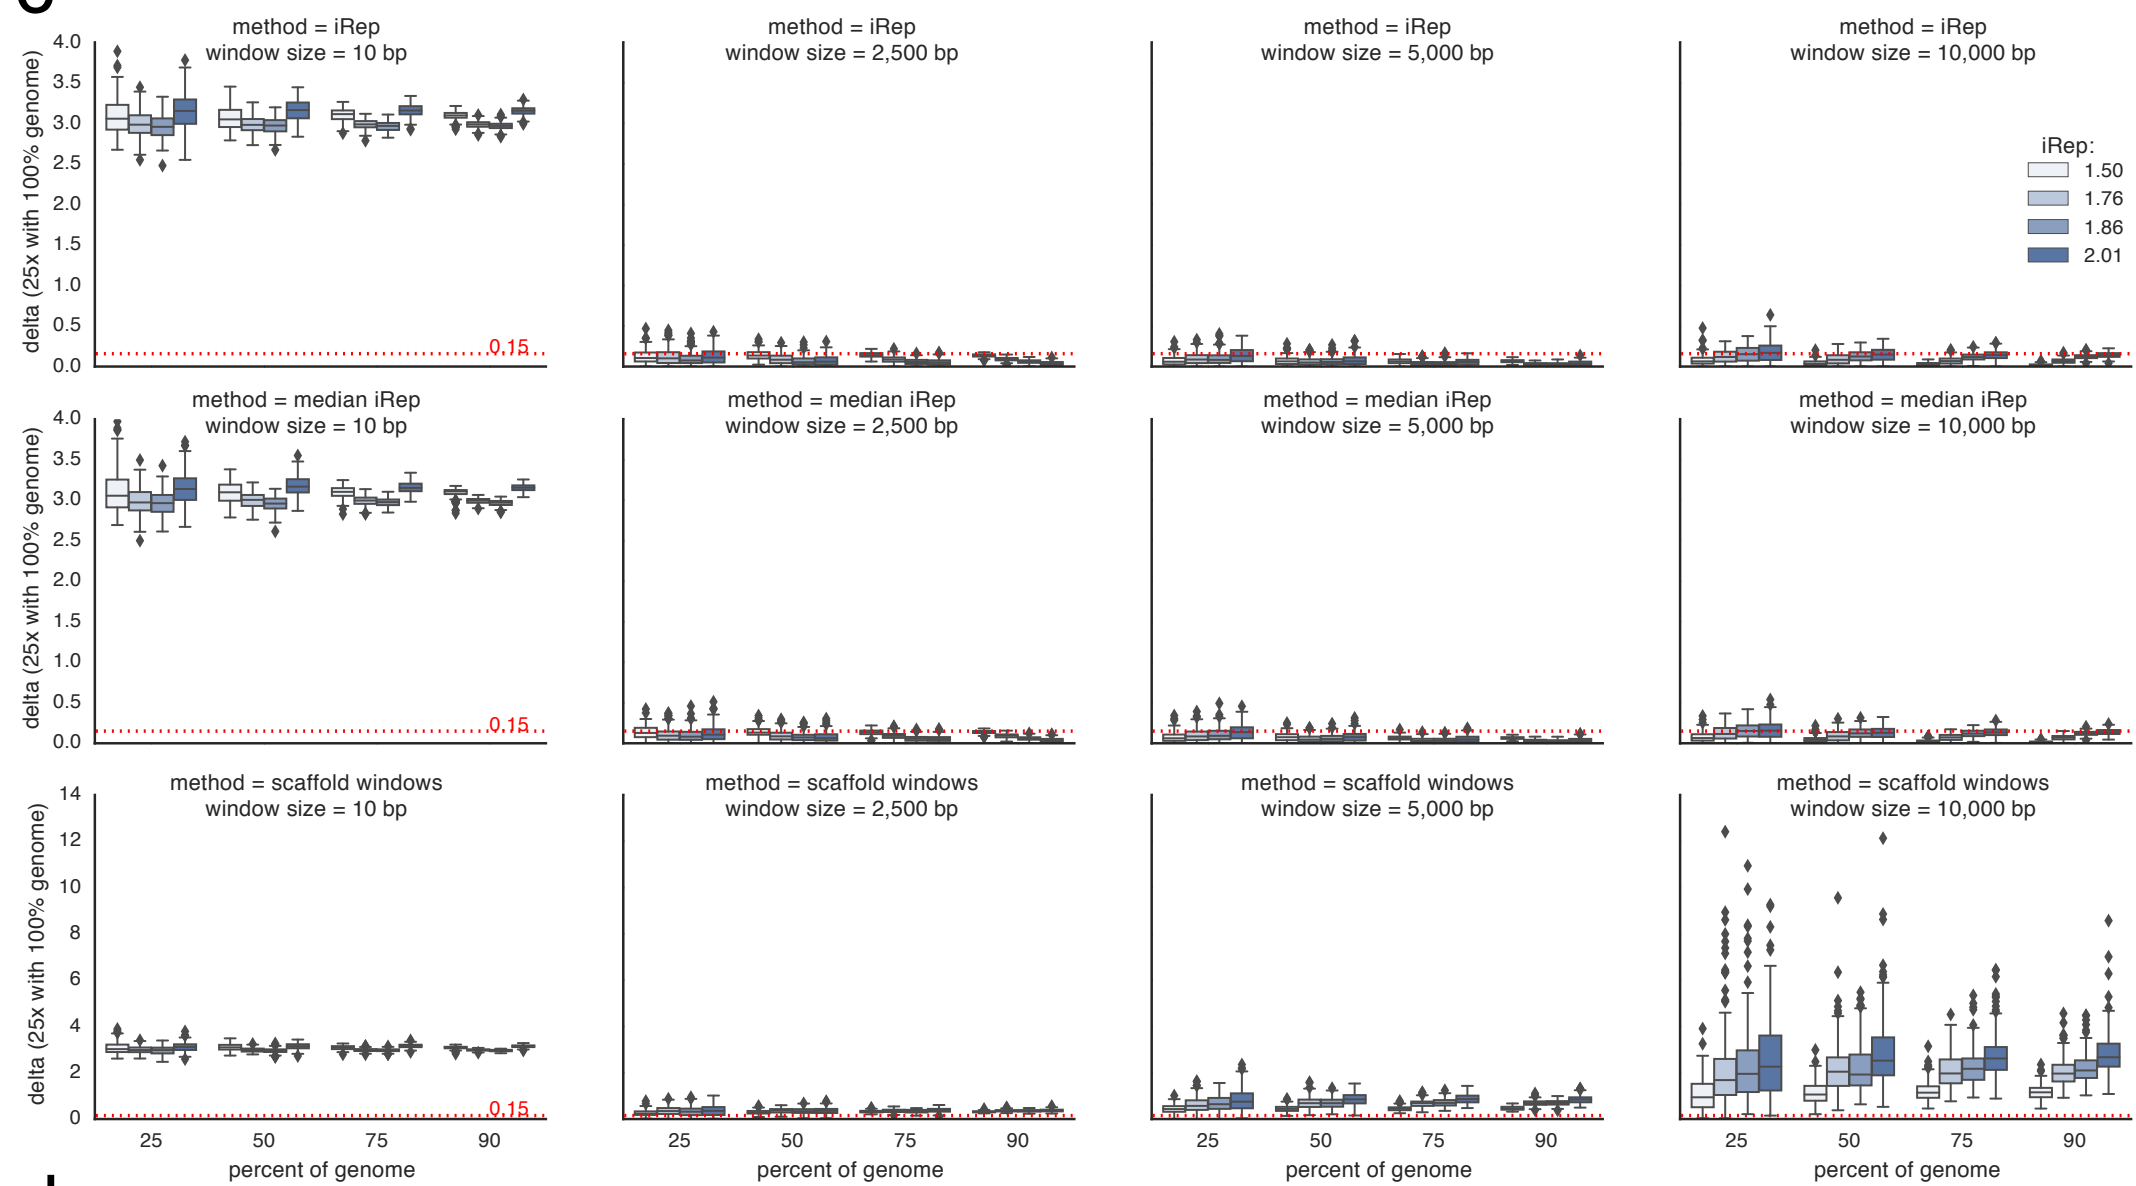**d**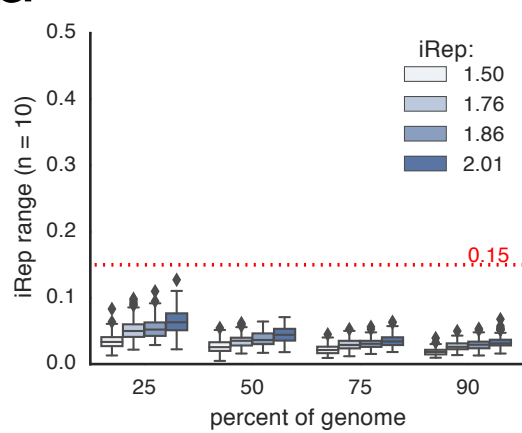**e**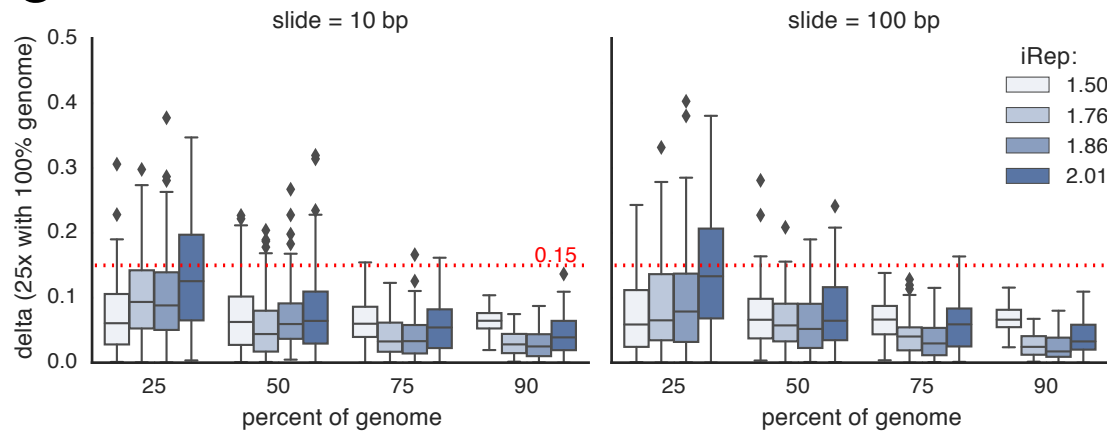**f**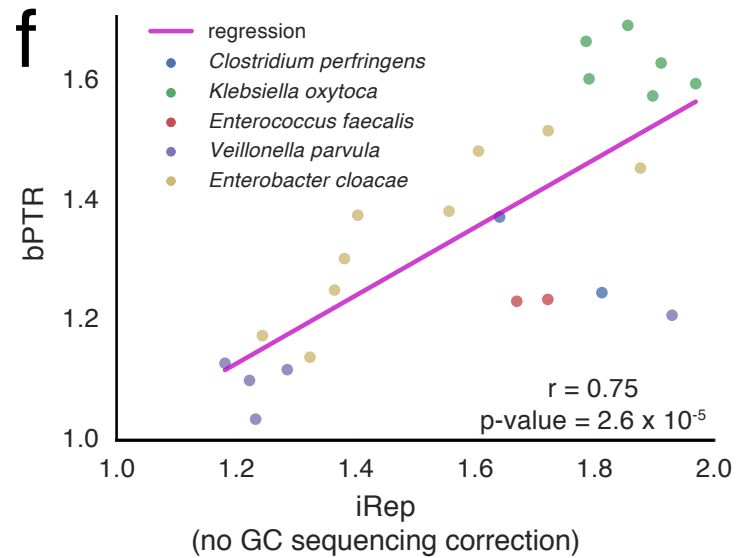



# Supplementary Figure 4

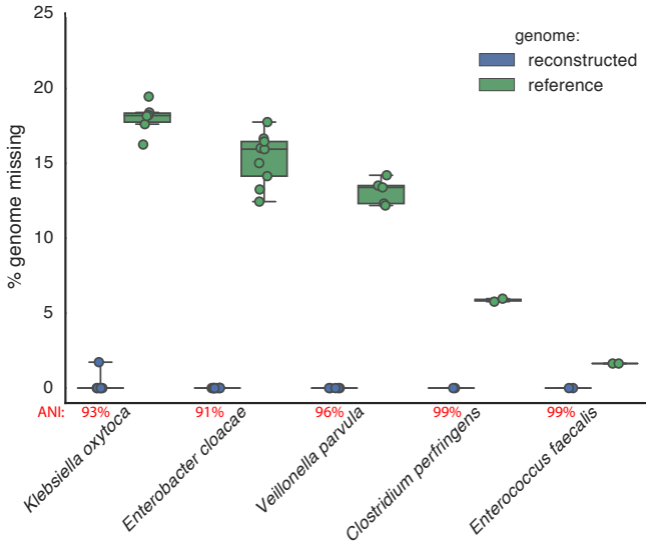

# Supplementary Figure 5

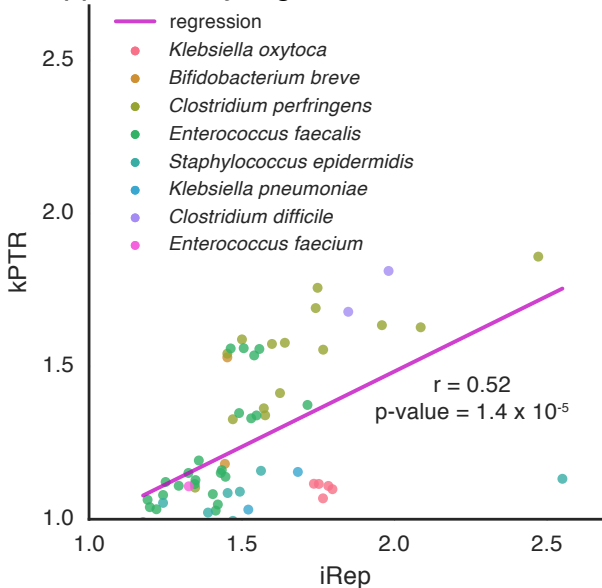

## Supplementary Figure 6

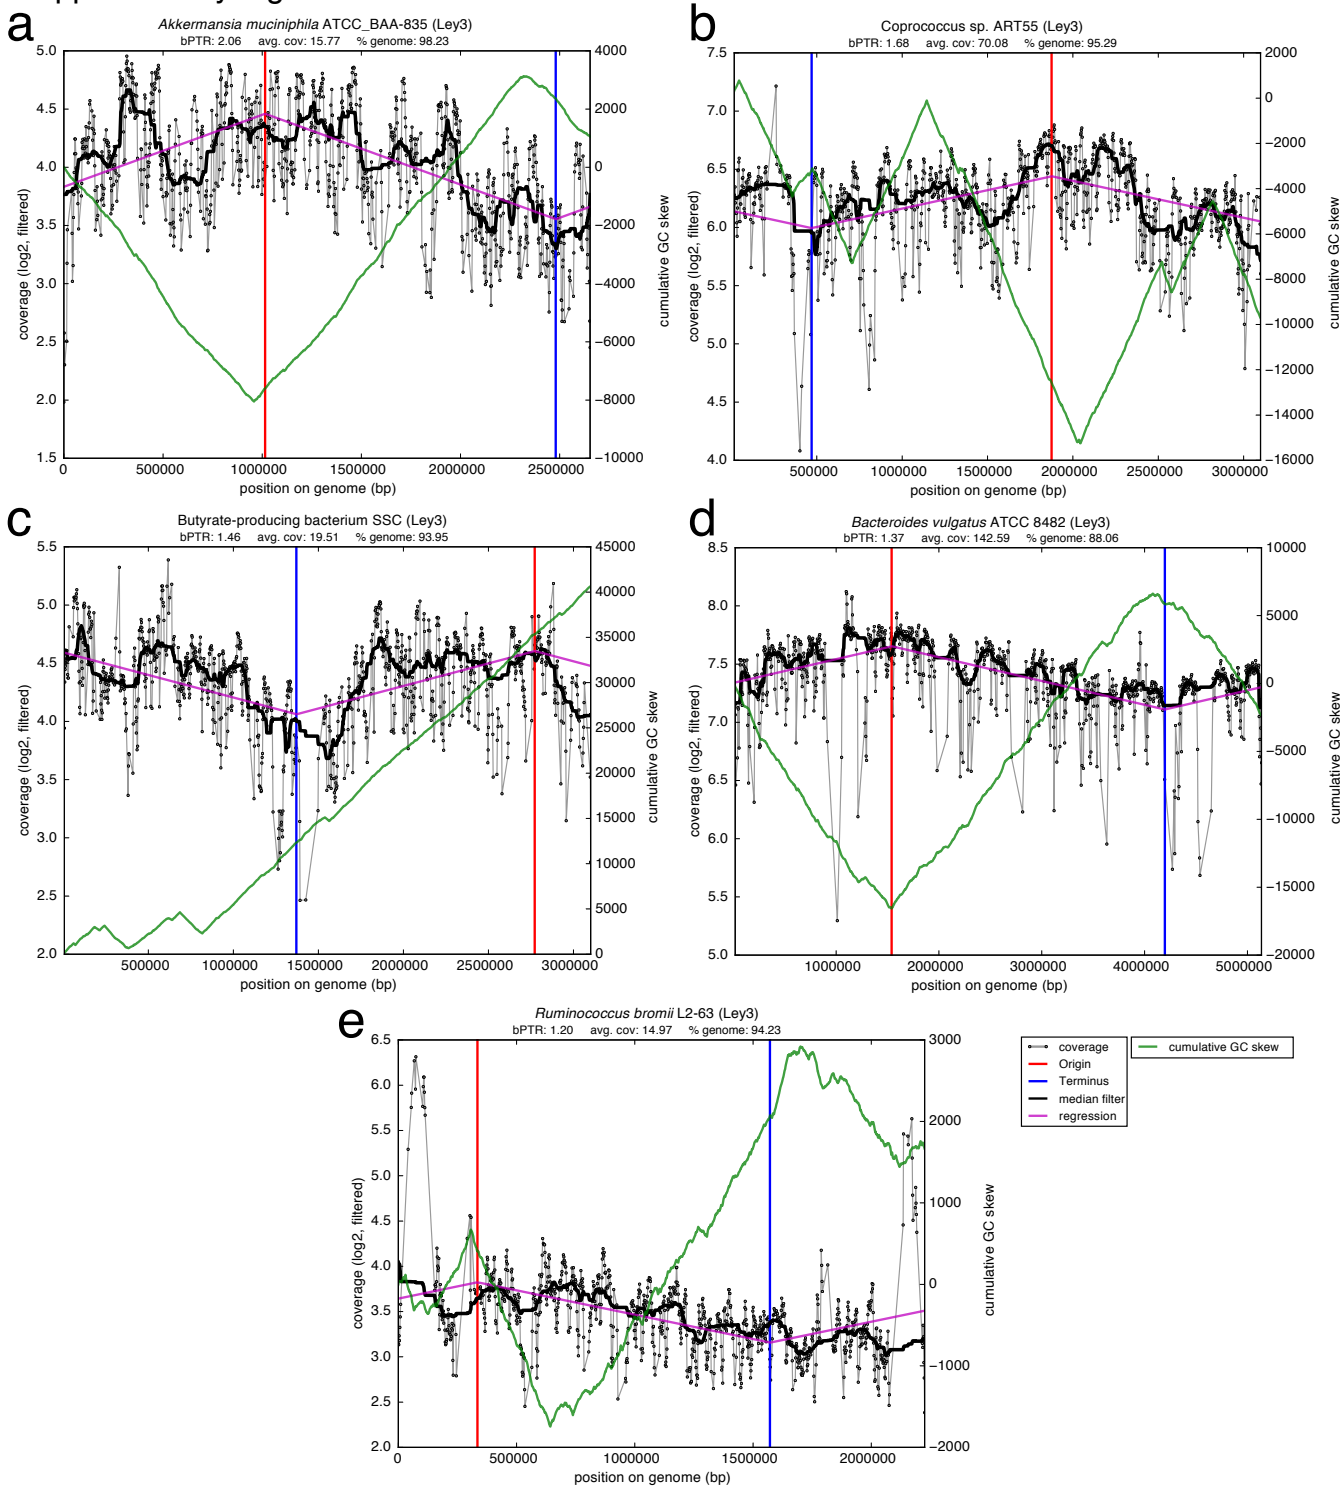

Supplementary Figure 7

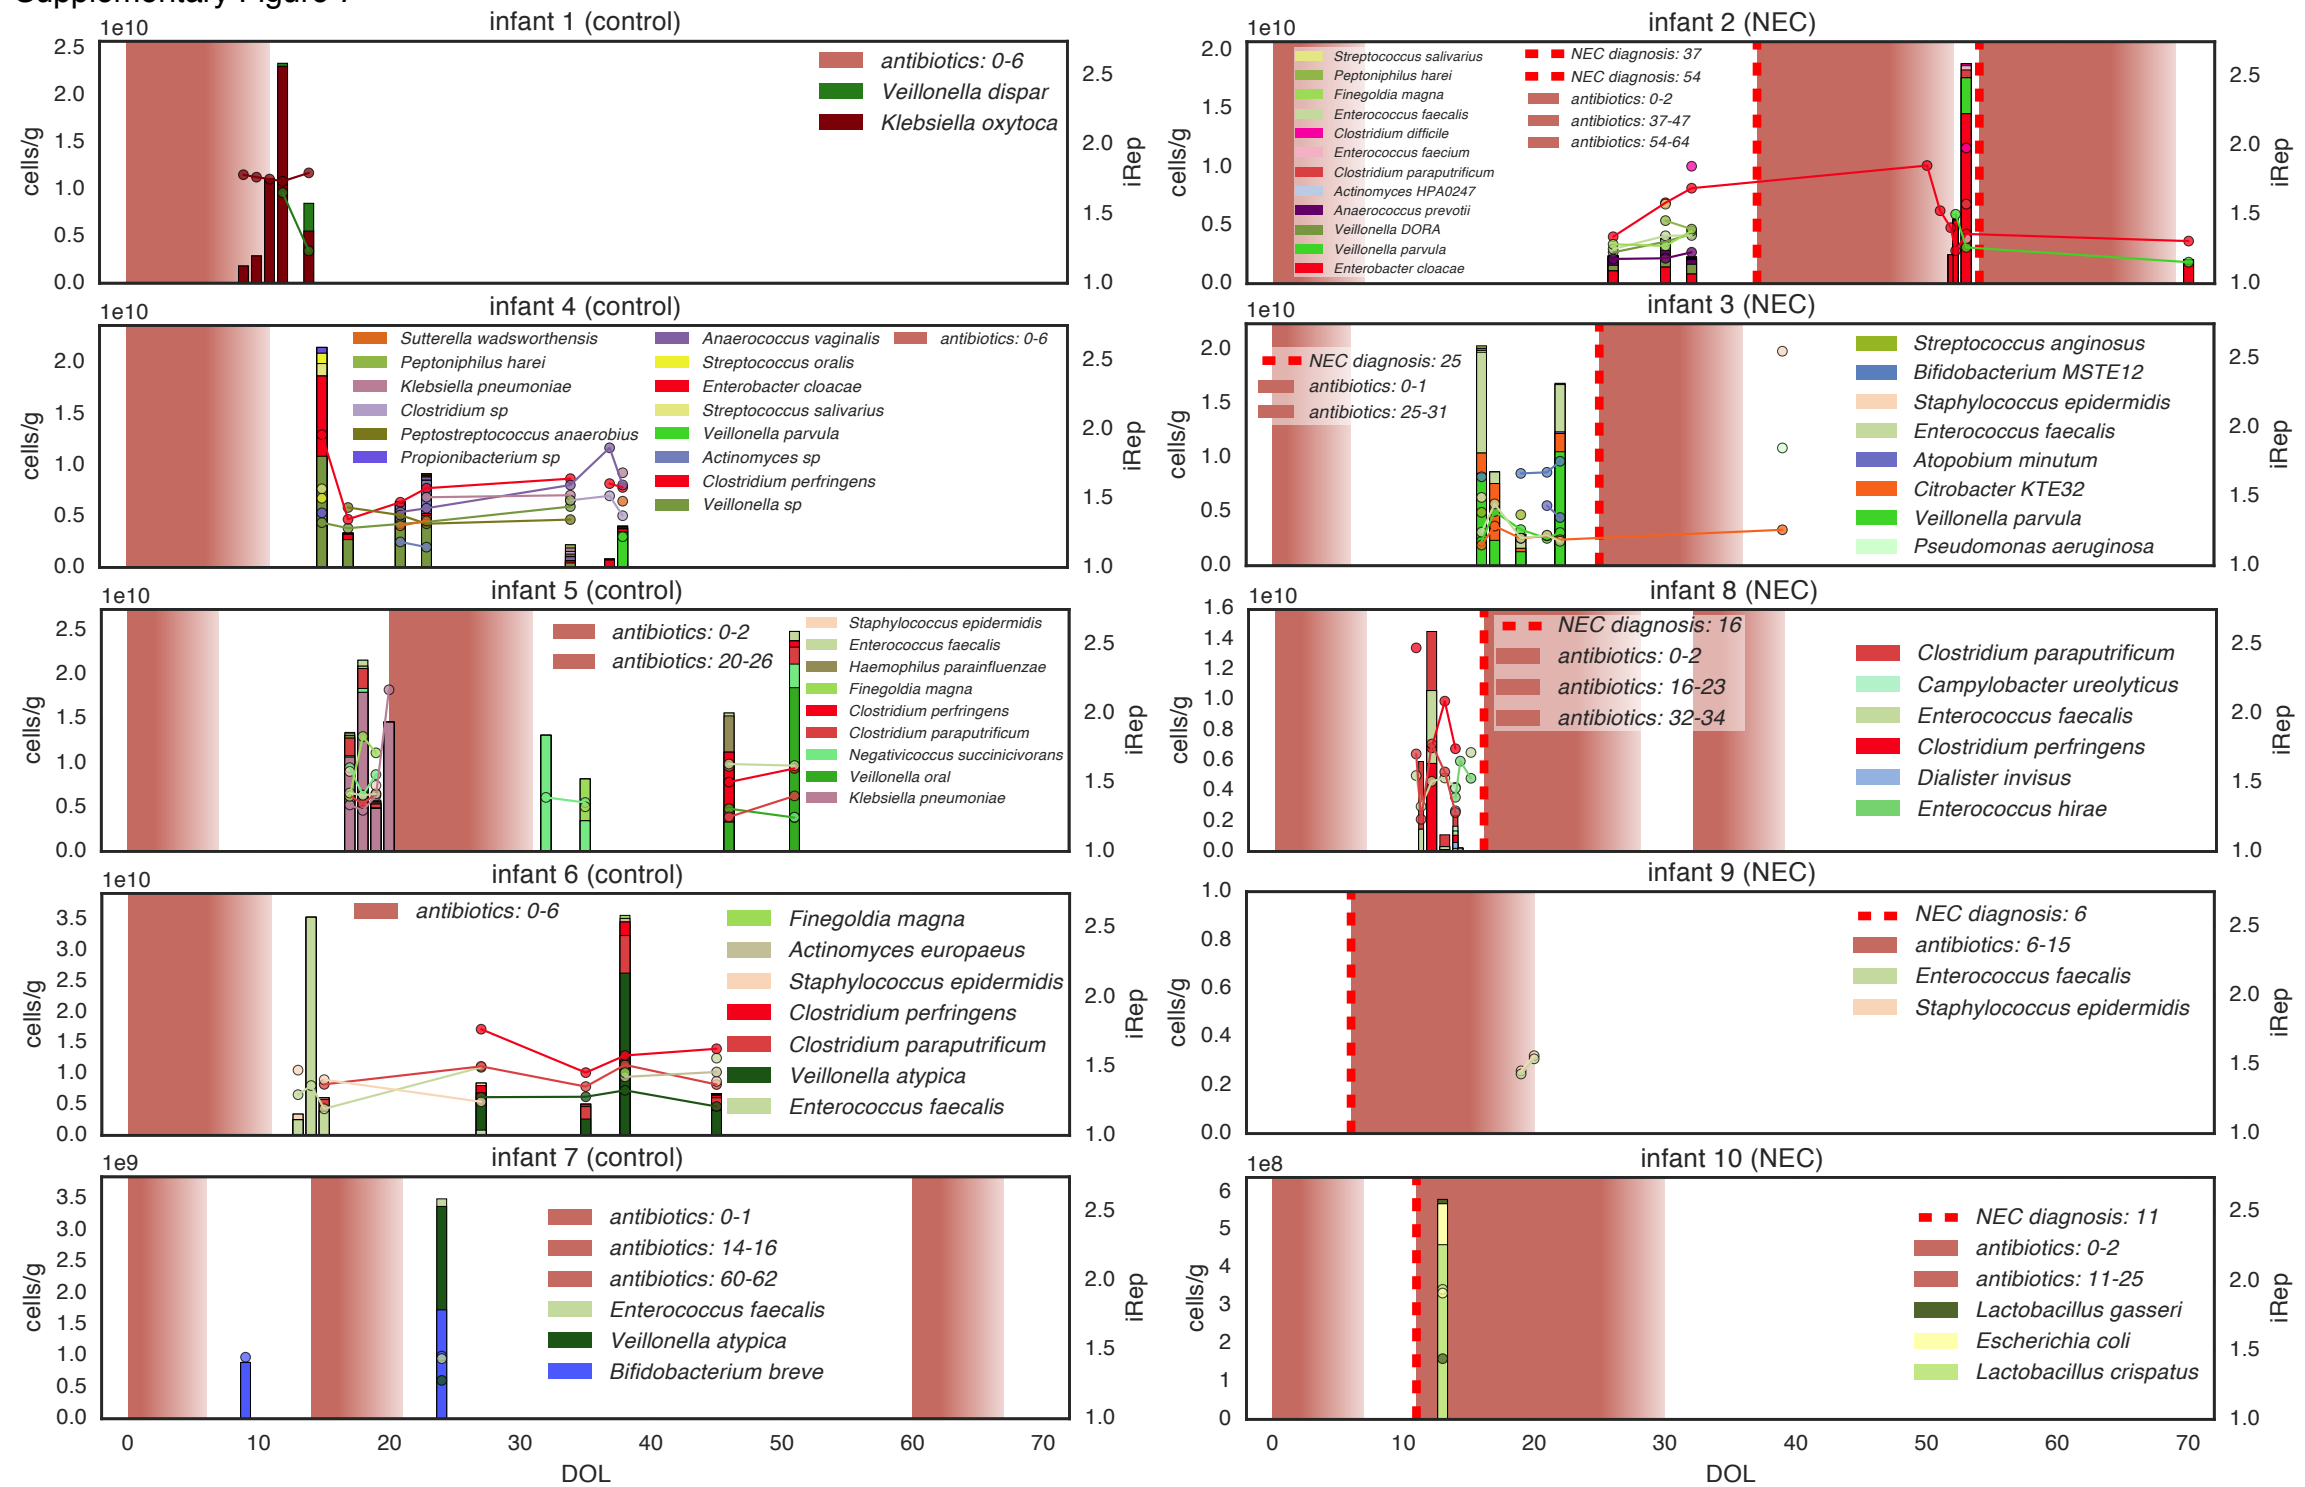

Supplement: NIHMS884305-supplement-SupplementalFigures.pdf [file NIHMS884305-supplement-SupplementalFigures.pdf]
